# Supplementary material for: Miracle Fruit (Synsepalum dulcificum) Exhibits as a Novel Anti-Hyperuricaemia Agent
Source: MDPI journal article supplement (doi:10.3390/molecules21020140), 2016-01-26
Supplement: s1 [file s1]

# Supplementary Material: Miracle Fruit (*Synsepalum dulcificum*) Exhibits as a Novel Anti-Hyperuricaemia Agent

Yeu-Ching Shi, Kai-Sian Lin, Yi-Fen Jhai, Bao-Hong Lee, Yifan Han, Zhibin Cui, Wei-Hsuan Hsu and She-Ching Wu

**Table S1.** The antioxidant levels of miracle fruit powder (MFP) and miracle fruit-water extract (MFWE).

| Sample | Total Phenolics   | Total Flavonoids | Total Anthocyanins |
|--------|-------------------|------------------|--------------------|
|        | (mg/g dry weight) |                  |                    |
| MFP    | 11.63 ± 0.16      | 0.79 ± 0.05      | 0.21 ± 0.04        |
| MFWE   | 7.44 ± 0.33       | 0.55 ± 0.03      | 0.17 ± 0.12        |

Each value is expressed as mean ± S.D. ( $n = 3$ ).

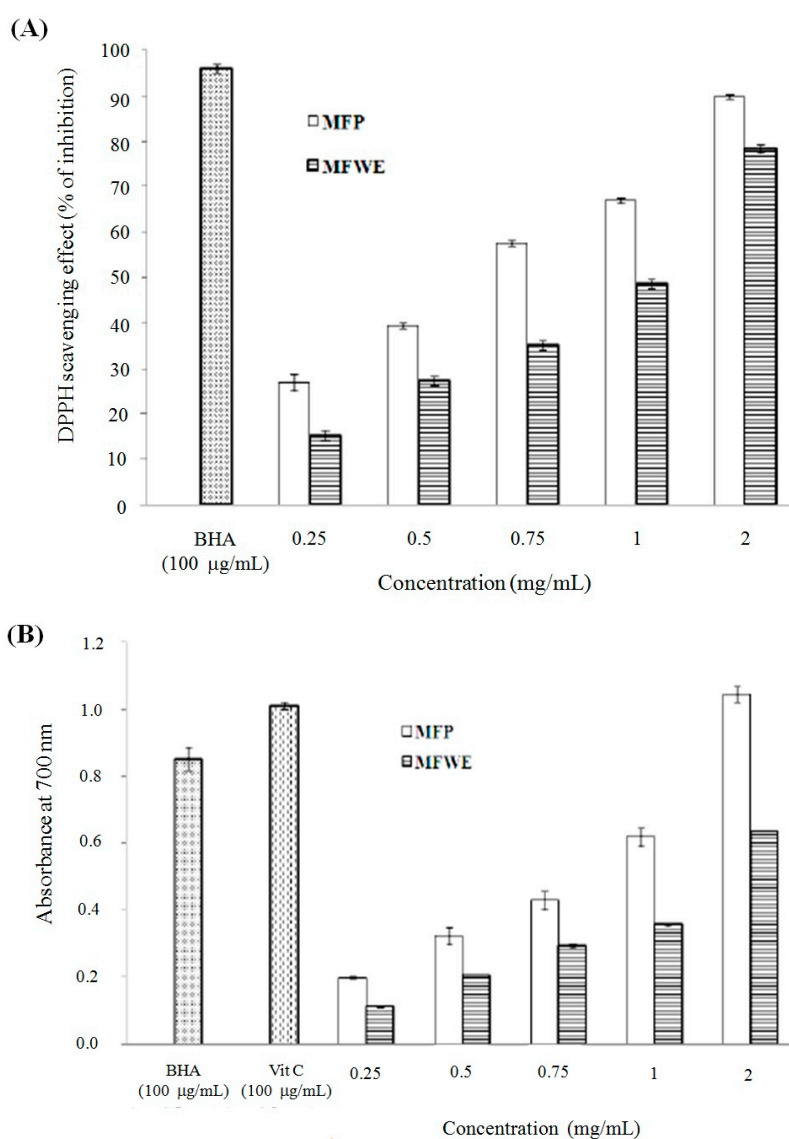

**Figure S1.** Cont.

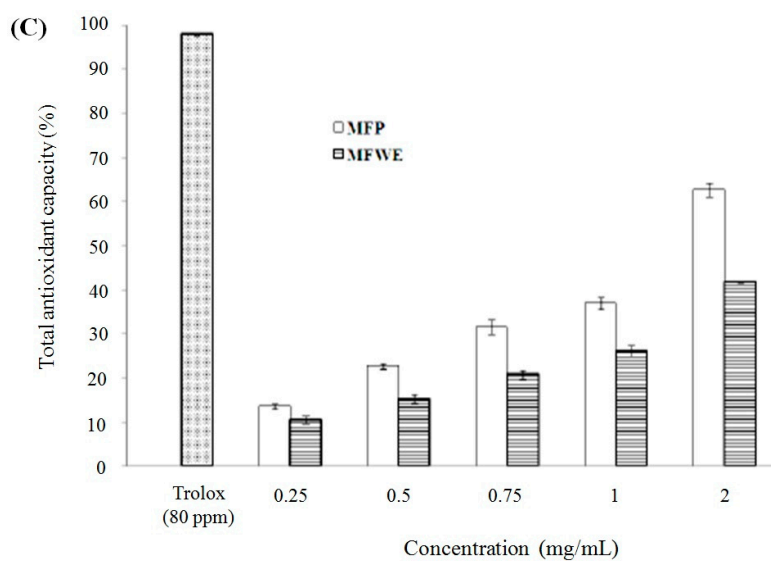

**Figure S1.** The effects of miracle fruit powder (MFP) and miracle fruit-water extract (MFWE) on (A) DPPH radical scavenging capacity; (B) reducing power; and (C) TEAC activity. Each value is expressed as mean  $\pm$  S.D. ( $n = 3$ ).

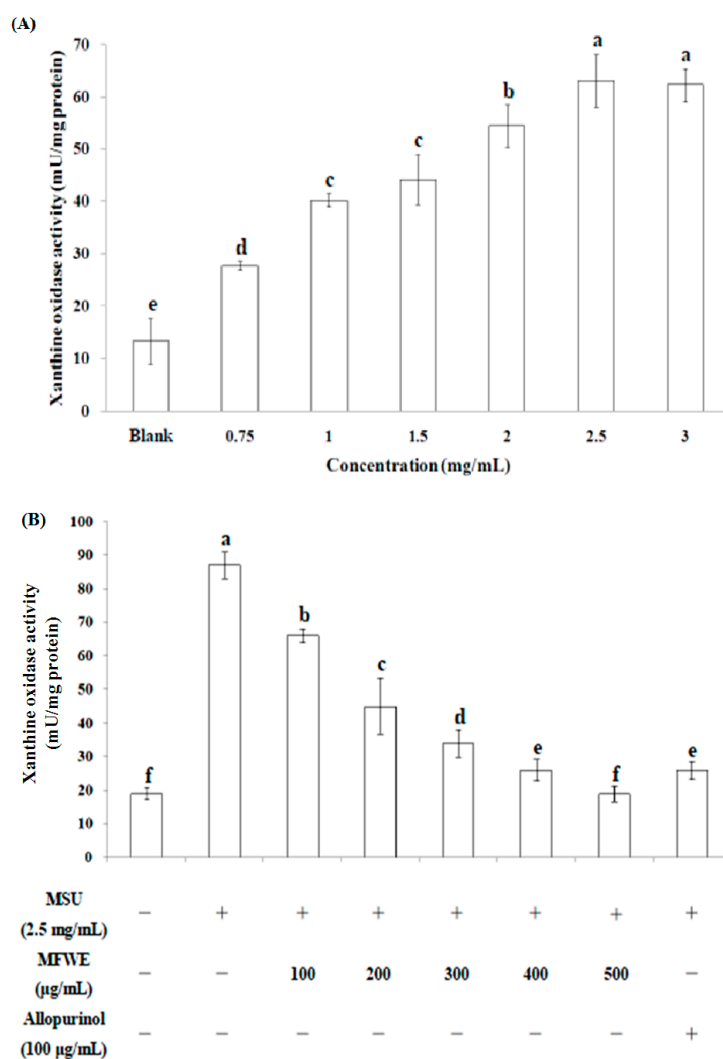

**Figure S2.** The inhibitory effects of miracle fruit-water extract (MFWE) on xanthine oxidase activity *in vitro* (A); and in MSU-treated RAW264.7 cells (B). Each value is expressed as mean  $\pm$  S.D. ( $n = 3$ ).
